# Supplementary material for: The transferome of metabolic genes explored: analysis of the horizontal transfer of enzyme encoding genes in unicellular eukaryotes
Source: Springer Nature journal article supplement (doi:10.1186/gb-2009-10-4-r36), 2009-04-15
Supplement: Additional file 6 [file gb-2009-10-4-r36-s6.doc]

| E. coli enzyme name | E.C. number | KO id | *P. ramorum* | *P. sojae* |
| --- | --- | --- | --- | --- |
| LpxA | 2.3.1.129 | K00677 | 2.90E-81 | 9.30E-79 |
| LpxB | 2.4.1.182 | K00748 | 1.80E-79 | 1.70E-79 |
| LpxK | 2.7.1.130 | K00912 | 1.50E-43 | 4.10E-42 |
| KdsB | 2.7.7.38 | K00979 | 1.10E-83 | 1.30E-78 |
| KdsA | 2.5.1.55 | K01627 | 4.00E-103 | 3.00E-105 |
| LpxL | 2.3.1.- | K02517 | 2.10E-29 | 1.30E-22 |
| KdtA | 2.-.-.- | K02527 | 3.60E-86 | 5.80E-85 |
| LpxC | 3.5.1.- | K02535 | 6.30E-87 | 5.30E-83 |
| LpxD | 2.3.1.- | K02536 | 3.50E-74 | 2.50E-77 |
| LpxM | 2.3.1.- | K02560 | 8.30E-04 | na |
| RfaB | 2.4.1.- | K02840 | na | 8.10E-07 |
| RfaF | 2.4.-.- | K02843 | 0.011 | 0.001 |
| RfaG | 2.4.1.- | K02844 | 1.40E-09 | 5.80E-09 |
| RfaL | 6.-.-.- | K02847 | 0.006 | na |
| RfaP | 2.7.-.- | K02848 | na | 0.026 |
| RfaQ | 2.4.-.-. | K02849 | 0.005 | 0.028 |
| RfaY | 2.7.-.- | K02850 | 8.70E-05 | 5.30E-05 |
| LpxH | 3.6.1.- | K03269 | 1.40E-05 | 9.70E-07 |
| KdsC | 3.1.3.45 | K03270 | 0.006 | 0.034 |
| RfaE | 3.1.3.45 | K03272 | 1.20E-15 | 2.40E-18 |
| GmhB | 3.1.1.- | K03273 | 3.30E-12 | 1.20E-08 |
| RfaD | 5.1.3.20 | K03274 | 8.50E-15 | 4.90E-15 |
| RfaK | 2.4.1.56 | K03280 | 1.90E-07 | 2.00E-07 |
